# Supplementary material for: Mitochondrial fission protein Drp1 inhibition promotes cardiac mesodermal differentiation of human pluripotent stem cells
Source: PubMed Central journal article supplement (PMC5841367; doi:10.1038/s41420-018-0042-9), 2018-03-05
Supplement: 41420_2018_42_MOESM1_ESM.pdf [file 41420_2018_42_MOESM1_ESM.pdf]

**Supplementary Information**

**Mitochondrial fission protein Drp1 inhibition promotes cardiac mesodermal differentiation of human pluripotent stem cells**

Ashfaql Hoque, Priyadharshini Sivakumaran, Simon T. Bond, Naomi X.Y. Ling, Anne M. Kong, John Scott, Nadeeka Bandara, Damián Hernández, Guei-Sheung Liu, Raymond C.B. Wong, Michael T. Ryan, Derek J. Hausenloy, Bruce E. Kemp, Jonathan S. Oakhill, Brian G. Drew, Alice Pébay, Shiang Y. Lim

**Supplemental Table S1.** Kinase profiling of Mdivi-1 at 10  $\mu$ M by KINOMEScan assay.

| <b>DiscoverX Gene Symbol</b>  | <b>Percent Control</b> | <b>DiscoverX Gene Symbol</b> | <b>Percent Control</b> |
|-------------------------------|------------------------|------------------------------|------------------------|
| AAK1                          | 95                     | BRAF                         | 96                     |
| ABL1(E255K)-phosphorylated    | 71                     | BRAF(V600E)                  | 72                     |
| ABL1(F317I)-nonphosphorylated | 95                     | BRK                          | 84                     |
| ABL1(F317I)-phosphorylated    | 100                    | BRSK1                        | 94                     |
| ABL1(F317L)-nonphosphorylated | 92                     | BRSK2                        | 93                     |
| ABL1(F317L)-phosphorylated    | 92                     | BTK                          | 88                     |
| ABL1(H396P)-nonphosphorylated | 88                     | BUB1                         | 100                    |
| ABL1(H396P)-phosphorylated    | 83                     | CAMK1                        | 77                     |
| ABL1(M351T)-phosphorylated    | 95                     | CAMK1B                       | 74                     |
| ABL1(Q252H)-nonphosphorylated | 64                     | CAMK1D                       | 85                     |
| ABL1(Q252H)-phosphorylated    | 100                    | CAMK1G                       | 98                     |
| ABL1(T315I)-nonphosphorylated | 96                     | CAMK2A                       | 97                     |
| ABL1(T315I)-phosphorylated    | 83                     | CAMK2B                       | 100                    |
| ABL1(Y253F)-phosphorylated    | 88                     | CAMK2D                       | 100                    |
| ABL1-nonphosphorylated        | 73                     | CAMK2G                       | 86                     |
| ABL1-phosphorylated           | 81                     | CAMK4                        | 90                     |
| ABL2                          | 92                     | CAMKK1                       | 95                     |
| ACVR1                         | 94                     | CAMKK2                       | 76                     |
| ACVR1B                        | 96                     | CASK                         | 83                     |
| ACVR2A                        | 100                    | CDC2L1                       | 89                     |
| ACVR2B                        | 100                    | CDC2L2                       | 100                    |
| ACVRL1                        | 83                     | CDC2L5                       | 88                     |
| ADCK3                         | 94                     | CDK11                        | 100                    |
| ADCK4                         | 100                    | CDK2                         | 91                     |
| AKT1                          | 89                     | CDK3                         | 100                    |
| AKT2                          | 100                    | CDK4                         | 86                     |
| AKT3                          | 100                    | CDK4-cyclinD1                | 94                     |
| ALK                           | 91                     | CDK4-cyclinD3                | 100                    |
| ALK(C1156Y)                   | 70                     | CDK5                         | 100                    |
| ALK(L1196M)                   | 79                     | CDK7                         | 95                     |
| AMPK-alpha1                   | 100                    | CDK8                         | 96                     |
| AMPK-alpha2                   | 87                     | CDK9                         | 94                     |
| ANKK1                         | 97                     | CDKL1                        | 100                    |
| ARK5                          | 99                     | CDKL2                        | 100                    |
| ASK1                          | 99                     | CDKL3                        | 98                     |
| ASK2                          | 84                     | CDKL5                        | 89                     |
| AURKA                         | 82                     | CHEK1                        | 90                     |
| AURKB                         | 86                     | CHEK2                        | 89                     |
| AURKC                         | 88                     | CIT                          | 94                     |
| AXL                           | 100                    | CLK1                         | 95                     |
| BIKE                          | 93                     | CLK2                         | 100                    |
| BLK                           | 95                     | CLK3                         | 97                     |
| BMPR1A                        | 97                     | CLK4                         | 92                     |
| BMPR1B                        | 86                     | CSF1R                        | 95                     |
| BMPR2                         | 84                     | CSF1R-autoinhibited          | 100                    |
| BMX                           | 100                    | CSK                          | 97                     |

|                           |     |                       |     |
|---------------------------|-----|-----------------------|-----|
| CSNK1A1                   | 71  | EPHB4                 | 86  |
| CSNK1A1L                  | 88  | EPHB6                 | 90  |
| CSNK1D                    | 78  | ERBB2                 | 100 |
| CSNK1E                    | 92  | ERBB3                 | 89  |
| CSNK1G1                   | 100 | ERBB4                 | 90  |
| CSNK1G2                   | 88  | ERK1                  | 94  |
| CSNK1G3                   | 92  | ERK2                  | 100 |
| CSNK2A1                   | 52  | ERK3                  | 88  |
| CSNK2A2                   | 35  | ERK4                  | 95  |
| CTK                       | 100 | ERK5                  | 95  |
| DAPK1                     | 100 | ERK8                  | 96  |
| DAPK2                     | 95  | ERN1                  | 100 |
| DAPK3                     | 85  | FAK                   | 94  |
| DCAMKL1                   | 94  | FER                   | 95  |
| DCAMKL2                   | 100 | FES                   | 89  |
| DCAMKL3                   | 77  | FGFR1                 | 79  |
| DDR1                      | 90  | FGFR2                 | 84  |
| DDR2                      | 94  | FGFR3                 | 97  |
| DLK                       | 97  | FGFR3(G697C)          | 87  |
| DMPK                      | 100 | FGFR4                 | 82  |
| DMPK2                     | 88  | FGR                   | 79  |
| DRAK1                     | 98  | FLT1                  | 85  |
| DRAK2                     | 95  | FLT3                  | 100 |
| DYRK1A                    | 71  | FLT3(D835H)           | 97  |
| DYRK1B                    | 83  | FLT3(D835V)           | 43  |
| DYRK2                     | 97  | FLT3(D835Y)           | 78  |
| EGFR                      | 95  | FLT3(ITD)             | 83  |
| EGFR(E746-A750del)        | 80  | FLT3(ITD,D835V)       | 67  |
| EGFR(G719C)               | 67  | FLT3(ITD,F691L)       | 65  |
| EGFR(G719S)               | 52  | FLT3(K663Q)           | 93  |
| EGFR(L747-E749del, A750P) | 94  | FLT3(N841I)           | 78  |
| EGFR(L747-S752del, P753S) | 83  | FLT3(R834Q)           | 87  |
| EGFR(L747-T751del,Sins)   | 69  | FLT3-autoinhibited    | 100 |
| EGFR(L858R)               | 99  | FLT4                  | 100 |
| EGFR(L858R,T790M)         | 100 | FRK                   | 86  |
| EGFR(L861Q)               | 65  | FYN                   | 81  |
| EGFR(S752-I759del)        | 40  | GAK                   | 83  |
| EGFR(T790M)               | 85  | GCN2(Kin.Dom.2,S808G) | 100 |
| EIF2AK1                   | 100 | GRK1                  | 96  |
| EPHA1                     | 87  | GRK2                  | 97  |
| EPHA2                     | 91  | GRK3                  | 100 |
| EPHA3                     | 97  | GRK4                  | 96  |
| EPHA4                     | 100 | GRK7                  | 100 |
| EPHA5                     | 99  | GSK3A                 | 94  |
| EPHA6                     | 98  | GSK3B                 | 84  |
| EPHA7                     | 97  | HASPIN                | 90  |
| EPHA8                     | 95  | HCK                   | 92  |
| EPHB1                     | 99  | HIPK1                 | 82  |
| EPHB2                     | 100 | HIPK2                 | 92  |
| EPHB3                     | 98  | HIPK3                 | 70  |

|                              |     |             |     |
|------------------------------|-----|-------------|-----|
| HIPK4                        | 88  | MAP4K4      | 100 |
| HPK1                         | 98  | MAP4K5      | 100 |
| HUNK                         | 94  | MAPKAPK2    | 91  |
| ICK                          | 96  | MAPKAPK5    | 99  |
| IGF1R                        | 90  | MARK1       | 95  |
| IKK-alpha                    | 94  | MARK2       | 97  |
| IKK-beta                     | 100 | MARK3       | 95  |
| IKK-epsilon                  | 100 | MARK4       | 91  |
| INSR                         | 100 | MAST1       | 75  |
| INSRR                        | 99  | MEK1        | 89  |
| IRAK1                        | 81  | MEK2        | 94  |
| IRAK3                        | 88  | MEK3        | 84  |
| IRAK4                        | 73  | MEK4        | 85  |
| ITK                          | 90  | MEK5        | 87  |
| JAK1(JH1domain-catalytic)    | 100 | MEK6        | 99  |
| JAK1(JH2domain-pseudokinase) | 95  | MELK        | 97  |
| JAK2(JH1domain-catalytic)    | 60  | MERTK       | 93  |
| JAK3(JH1domain-catalytic)    | 86  | MET         | 87  |
| JNK1                         | 100 | MET(M1250T) | 84  |
| JNK2                         | 88  | MET(Y1235D) | 92  |
| JNK3                         | 100 | MINK        | 77  |
| KIT                          | 94  | MKK7        | 97  |
| KIT(A829P)                   | 93  | MKNK1       | 100 |
| KIT(D816H)                   | 95  | MKNK2       | 87  |
| KIT(D816V)                   | 87  | MLCK        | 98  |
| KIT(L576P)                   | 92  | MLK1        | 90  |
| KIT(V559D)                   | 91  | MLK2        | 100 |
| KIT(V559D,T670I)             | 96  | MLK3        | 100 |
| KIT(V559D,V654A)             | 97  | MRCKA       | 98  |
| KIT-autoinhibited            | 84  | MRCKB       | 99  |
| LATS1                        | 100 | MST1        | 100 |
| LATS2                        | 100 | MST1R       | 94  |
| LCK                          | 95  | MST2        | 82  |
| LIMK1                        | 95  | MST3        | 100 |
| LIMK2                        | 96  | MST4        | 91  |
| LKB1                         | 100 | MTOR        | 100 |
| LOK                          | 97  | MUSK        | 93  |
| LRRK2                        | 86  | MYLK        | 76  |
| LRRK2(G2019S)                | 82  | MYLK2       | 99  |
| LTK                          | 100 | MYLK4       | 96  |
| LYN                          | 100 | MYO3A       | 100 |
| LZK                          | 95  | MYO3B       | 100 |
| MAK                          | 88  | NDR1        | 82  |
| MAP3K1                       | 97  | NDR2        | 100 |
| MAP3K15                      | 84  | NEK1        | 100 |
| MAP3K2                       | 84  | NEK10       | 93  |
| MAP3K3                       | 97  | NEK11       | 84  |
| MAP3K4                       | 86  | NEK2        | 96  |
| MAP4K2                       | 71  | NEK3        | 86  |
| MAP4K3                       | 97  | NEK4        | 90  |

|                       |     |                               |     |
|-----------------------|-----|-------------------------------|-----|
| NEK5                  | 91  | PIP5K1A                       | 96  |
| NEK6                  | 100 | PIP5K1C                       | 96  |
| NEK7                  | 100 | PIP5K2B                       | 100 |
| NEK9                  | 100 | PIP5K2C                       | 85  |
| NIK                   | 91  | PKAC-alpha                    | 96  |
| NIM1                  | 90  | PKAC-beta                     | 100 |
| NLK                   | 93  | PKMYT1                        | 89  |
| OSR1                  | 97  | PKN1                          | 99  |
| p38-alpha             | 96  | PKN2                          | 100 |
| p38-beta              | 97  | PKNB(M.tuberculosis)          | 78  |
| p38-delta             | 88  | PLK1                          | 94  |
| p38-gamma             | 69  | PLK2                          | 100 |
| PAK1                  | 100 | PLK3                          | 100 |
| PAK2                  | 94  | PLK4                          | 82  |
| PAK3                  | 100 | PRKCD                         | 82  |
| PAK4                  | 100 | PRKCE                         | 89  |
| PAK6                  | 96  | PRKCH                         | 91  |
| PAK7                  | 96  | PRKCI                         | 88  |
| PCK1                  | 89  | PRKCQ                         | 81  |
| PCK2                  | 96  | PRKD1                         | 82  |
| PCK3                  | 100 | PRKD2                         | 97  |
| PDGFRA                | 100 | PRKD3                         | 97  |
| PDGFRB                | 77  | PRKG1                         | 100 |
| PDPK1                 | 100 | PRKG2                         | 94  |
| PFCDPK1(P.falciparum) | 78  | PRKR                          | 84  |
| PFPK5(P.falciparum)   | 82  | PRKX                          | 82  |
| PFTAIRE2              | 99  | PRP4                          | 89  |
| PFTK1                 | 100 | PYK2                          | 90  |
| PHKG1                 | 88  | QSK                           | 89  |
| PHKG2                 | 98  | RAF1                          | 43  |
| PIK3C2B               | 80  | RET                           | 100 |
| PIK3C2G               | 87  | RET(M918T)                    | 90  |
| PIK3CA                | 85  | RET(V804L)                    | 94  |
| PIK3CA(C420R)         | 91  | RET(V804M)                    | 97  |
| PIK3CA(E542K)         | 98  | RIOK1                         | 100 |
| PIK3CA(E545A)         | 95  | RIOK2                         | 96  |
| PIK3CA(E545K)         | 92  | RIOK3                         | 94  |
| PIK3CA(H1047L)        | 100 | RIPK1                         | 93  |
| PIK3CA(H1047Y)        | 90  | RIPK2                         | 97  |
| PIK3CA(I800L)         | 100 | RIPK4                         | 97  |
| PIK3CA(M1043I)        | 72  | RIPK5                         | 97  |
| PIK3CA(Q546K)         | 98  | ROCK1                         | 74  |
| PIK3CB                | 93  | ROCK2                         | 76  |
| PIK3CD                | 88  | ROS1                          | 99  |
| PIK3CG                | 95  | RPS6KA4(Kin.Dom.1-N-terminal) | 99  |
| PIK4CB                | 72  | RPS6KA4(Kin.Dom.2-C-terminal) | 98  |
| PIKFYVE               | 97  | RPS6KA5(Kin.Dom.1-N-terminal) | 91  |
| PIM1                  | 96  | RPS6KA5(Kin.Dom.2-C-terminal) | 100 |
| PIM2                  | 100 | RSK1(Kin.Dom.1-N-terminal)    | 100 |
| PIM3                  | 93  | RSK1(Kin.Dom.2-C-terminal)    | 100 |

|                            |     |                              |     |
|----------------------------|-----|------------------------------|-----|
| RSK2(Kin.Dom.1-N-terminal) | 93  | TIE2                         | 96  |
| RSK2(Kin.Dom.2-C-terminal) | 88  | TLK1                         | 100 |
| RSK3(Kin.Dom.1-N-terminal) | 89  | TLK2                         | 100 |
| RSK3(Kin.Dom.2-C-terminal) | 94  | TNIK                         | 96  |
| RSK4(Kin.Dom.1-N-terminal) | 80  | TNK1                         | 72  |
| RSK4(Kin.Dom.2-C-terminal) | 99  | TNK2                         | 96  |
| S6K1                       | 86  | TNNI3K                       | 91  |
| SBK1                       | 94  | TRKA                         | 72  |
| SGK                        | 79  | TRKB                         | 83  |
| SgK110                     | 87  | TRKC                         | 98  |
| SGK2                       | 93  | TRPM6                        | 71  |
| SGK3                       | 100 | TSSK1B                       | 90  |
| SIK                        | 94  | TSSK3                        | 93  |
| SIK2                       | 100 | TTK                          | 94  |
| SLK                        | 94  | TXK                          | 91  |
| SNARK                      | 71  | TYK2(JH1domain-catalytic)    | 52  |
| SNRK                       | 100 | TYK2(JH2domain-pseudokinase) | 83  |
| SRC                        | 95  | TYRO3                        | 72  |
| SRMS                       | 77  | ULK1                         | 98  |
| SRPK1                      | 100 | ULK2                         | 99  |
| SRPK2                      | 95  | ULK3                         | 86  |
| SRPK3                      | 94  | VEGFR2                       | 100 |
| STK16                      | 93  | VPS34                        | 91  |
| STK33                      | 91  | VRK2                         | 100 |
| STK35                      | 98  | WEE1                         | 100 |
| STK36                      | 100 | WEE2                         | 94  |
| STK39                      | 87  | WNK1                         | 96  |
| SYK                        | 94  | WNK2                         | 96  |
| TAK1                       | 91  | WNK3                         | 100 |
| TAOK1                      | 85  | WNK4                         | 100 |
| TAOK2                      | 71  | YANK1                        | 100 |
| TAOK3                      | 87  | YANK2                        | 88  |
| TBK1                       | 91  | YANK3                        | 94  |
| TEC                        | 92  | YES                          | 96  |
| TESK1                      | 85  | YSK1                         | 100 |
| TGFBR1                     | 59  | YSK4                         | 81  |
| TGFBR2                     | 100 | ZAK                          | 89  |
| TIE1                       | 100 | ZAP70                        | 67  |

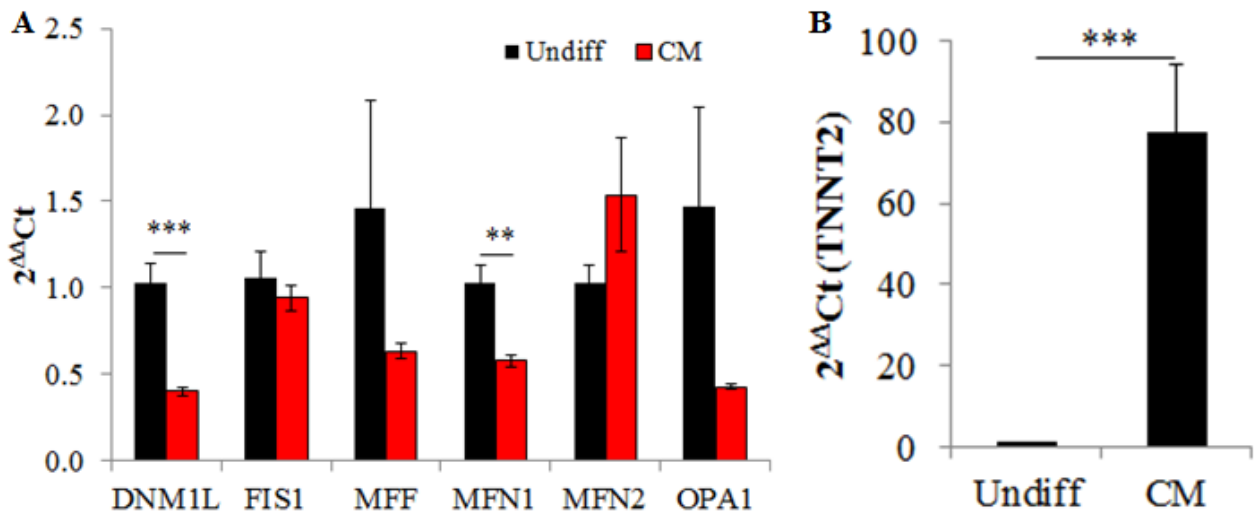

**Supplementary Figure S1. Mitochondrial morphology of human iPSCs and derived cardiomyocytes in CERA007c6 cell line.** (A-B) mRNA expression of mitochondrial fusion and fission genes (A), as well as cardiac-specific TNNT2 gene (B) in undifferentiated iPSCs (Undiff) and derived cardiomyocytes (CM) (n = 6 independent experiments). Data are shown as mean±SEM. \*\* $P < 0.01$ , \*\*\* $P < 0.001$  by unpaired Student's  $t$ -test.

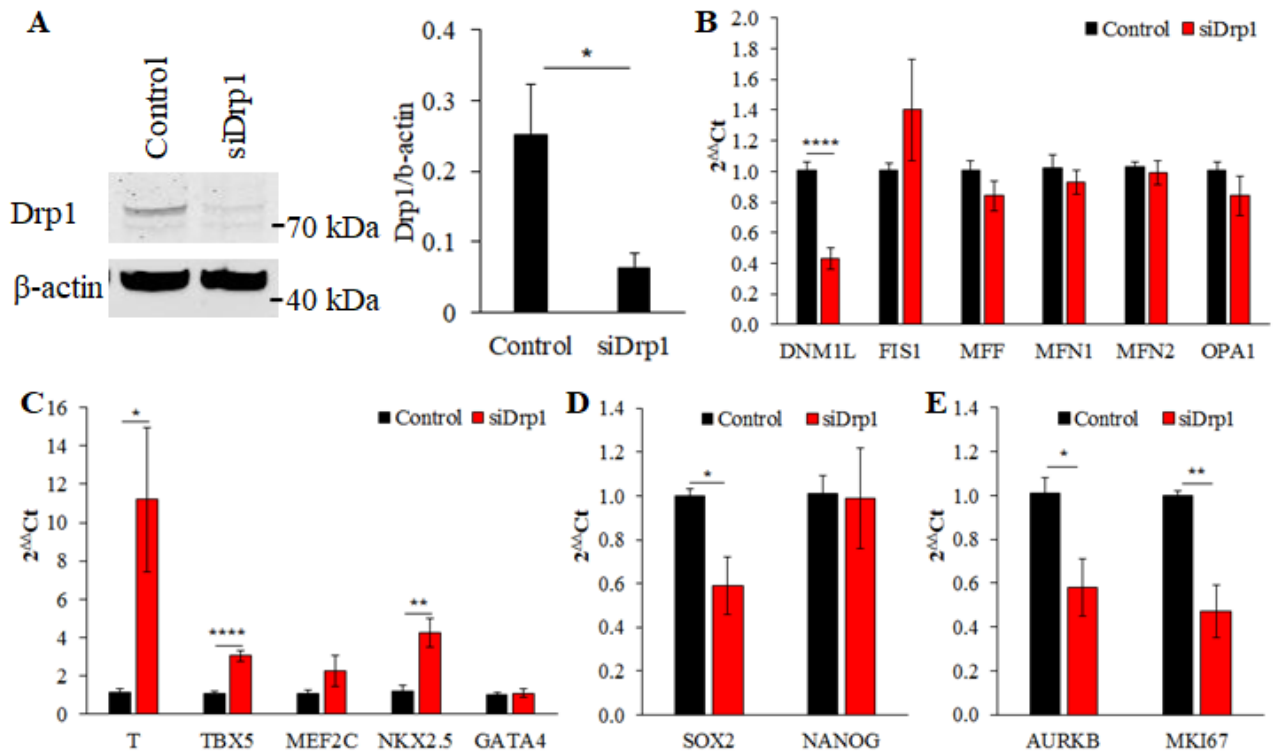

**Supplementary Figure S2. Drp1 knock down in CERA007c6 iPSC line.** (A) Western blotting analysis of Drp1 expression (n = 4 independent experiments). (B-E) mRNA expression of mitochondrial fusion and fission proteins (B), cardiac mesoderm transcription factors (C), pluripotency genes (D) and cell proliferation genes (E) in iPSCs treated with scrambled (control) or Drp1 siRNA (n = 6-7 independent experiments). Data are shown as mean $\pm$ SEM. \* $P < 0.05$ , \*\* $P < 0.01$ , \*\*\*\* $P < 0.0001$  by unpaired Student's  $t$ -test.



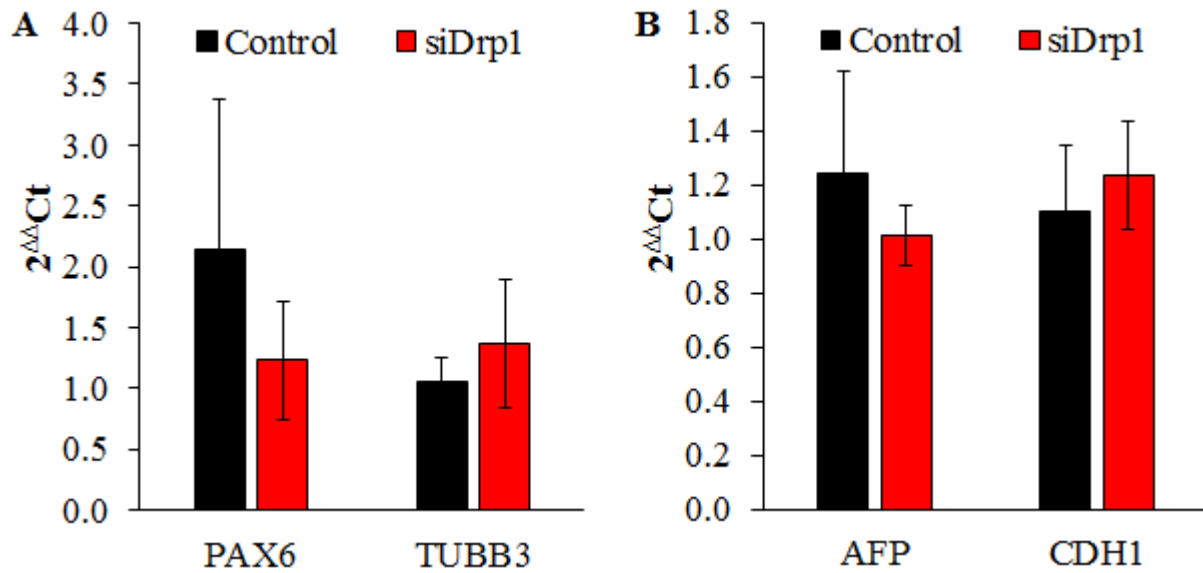

**Supplementary Figure S3.** Effect of Drp1 Knock down on ectodermal (*PAX6* and *TUBB3*) and endodermal (*AFP* and *CDH1*) gene expression in iPS-Foreskin-2 cell line. (n = 5 independent experiments). Data are shown as mean±SEM.

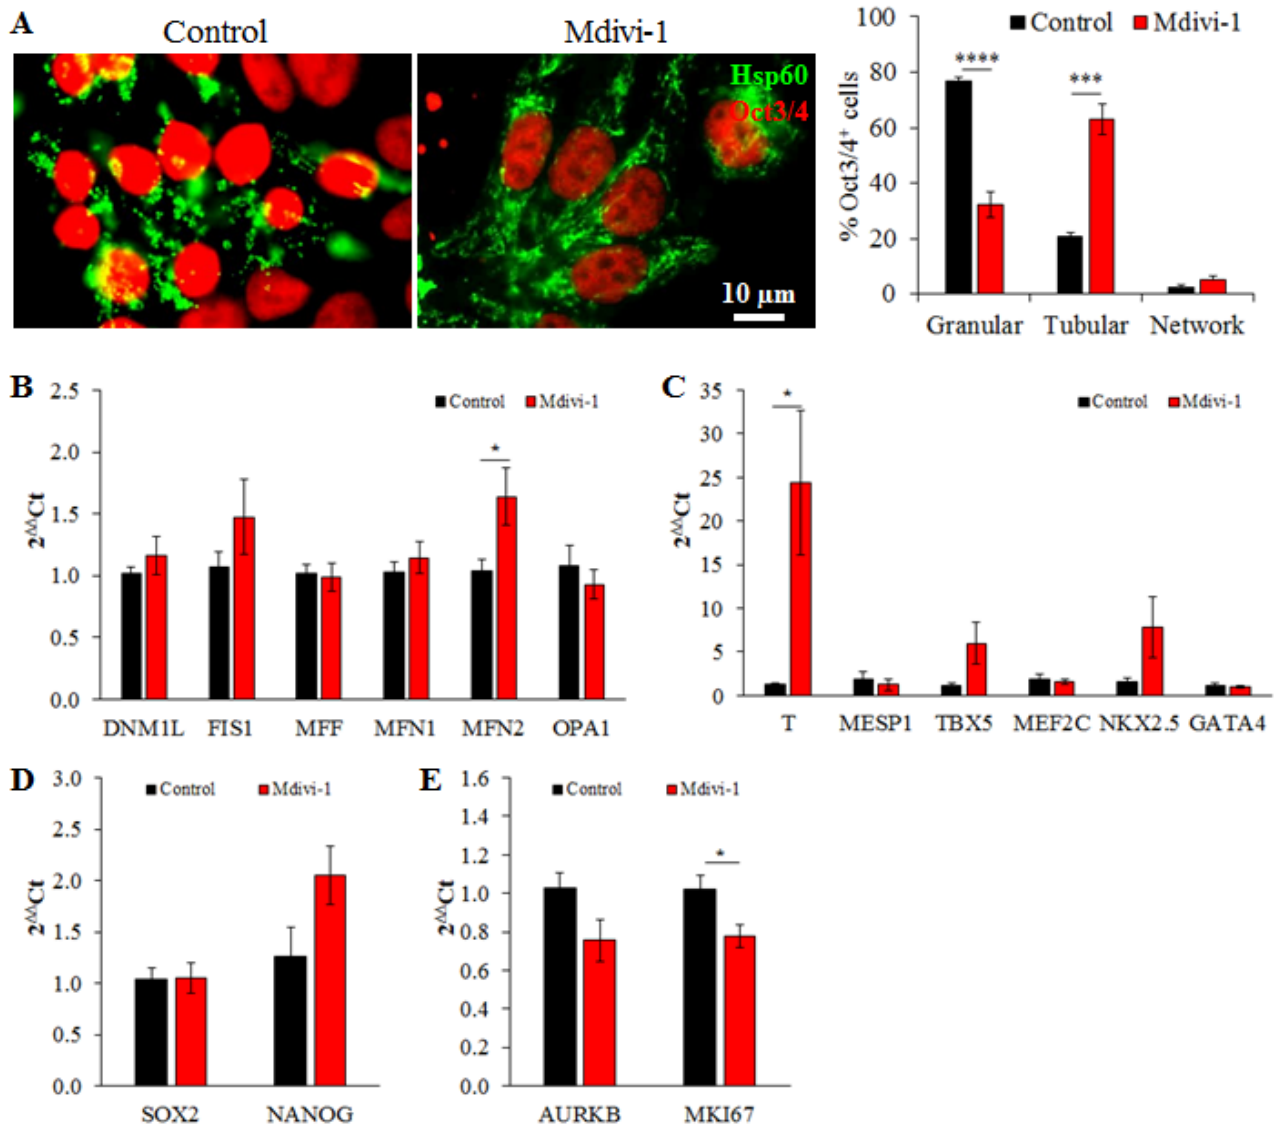

**Supplementary Figure S4. Mdivi-1 induces cardiac mesoderm differentiation of human iPSCs.**

(A) Morphology of mitochondria and percentage of Oct3/4 positive iPS-Foreskin-2 cells with different mitochondrial morphologies (n = 4 independent experiment). (B-C) mRNA expression of mitochondrial fusion and fission protein (B), cardiac mesoderm transcription factors (C), pluripotency genes (D) and cell proliferation genes (E) in iPS-Foreskin-2 cells treated with DMSO (control) or 5  $\mu$ M Mdivi-1 (n = 6-10 independent experiments). Data are shown as mean $\pm$ SEM. \* $P$  < 0.05, \*\*\* $P$  < 0.001, \*\*\*\* $P$  < 0.0001 by unpaired Student's  $t$ -test.

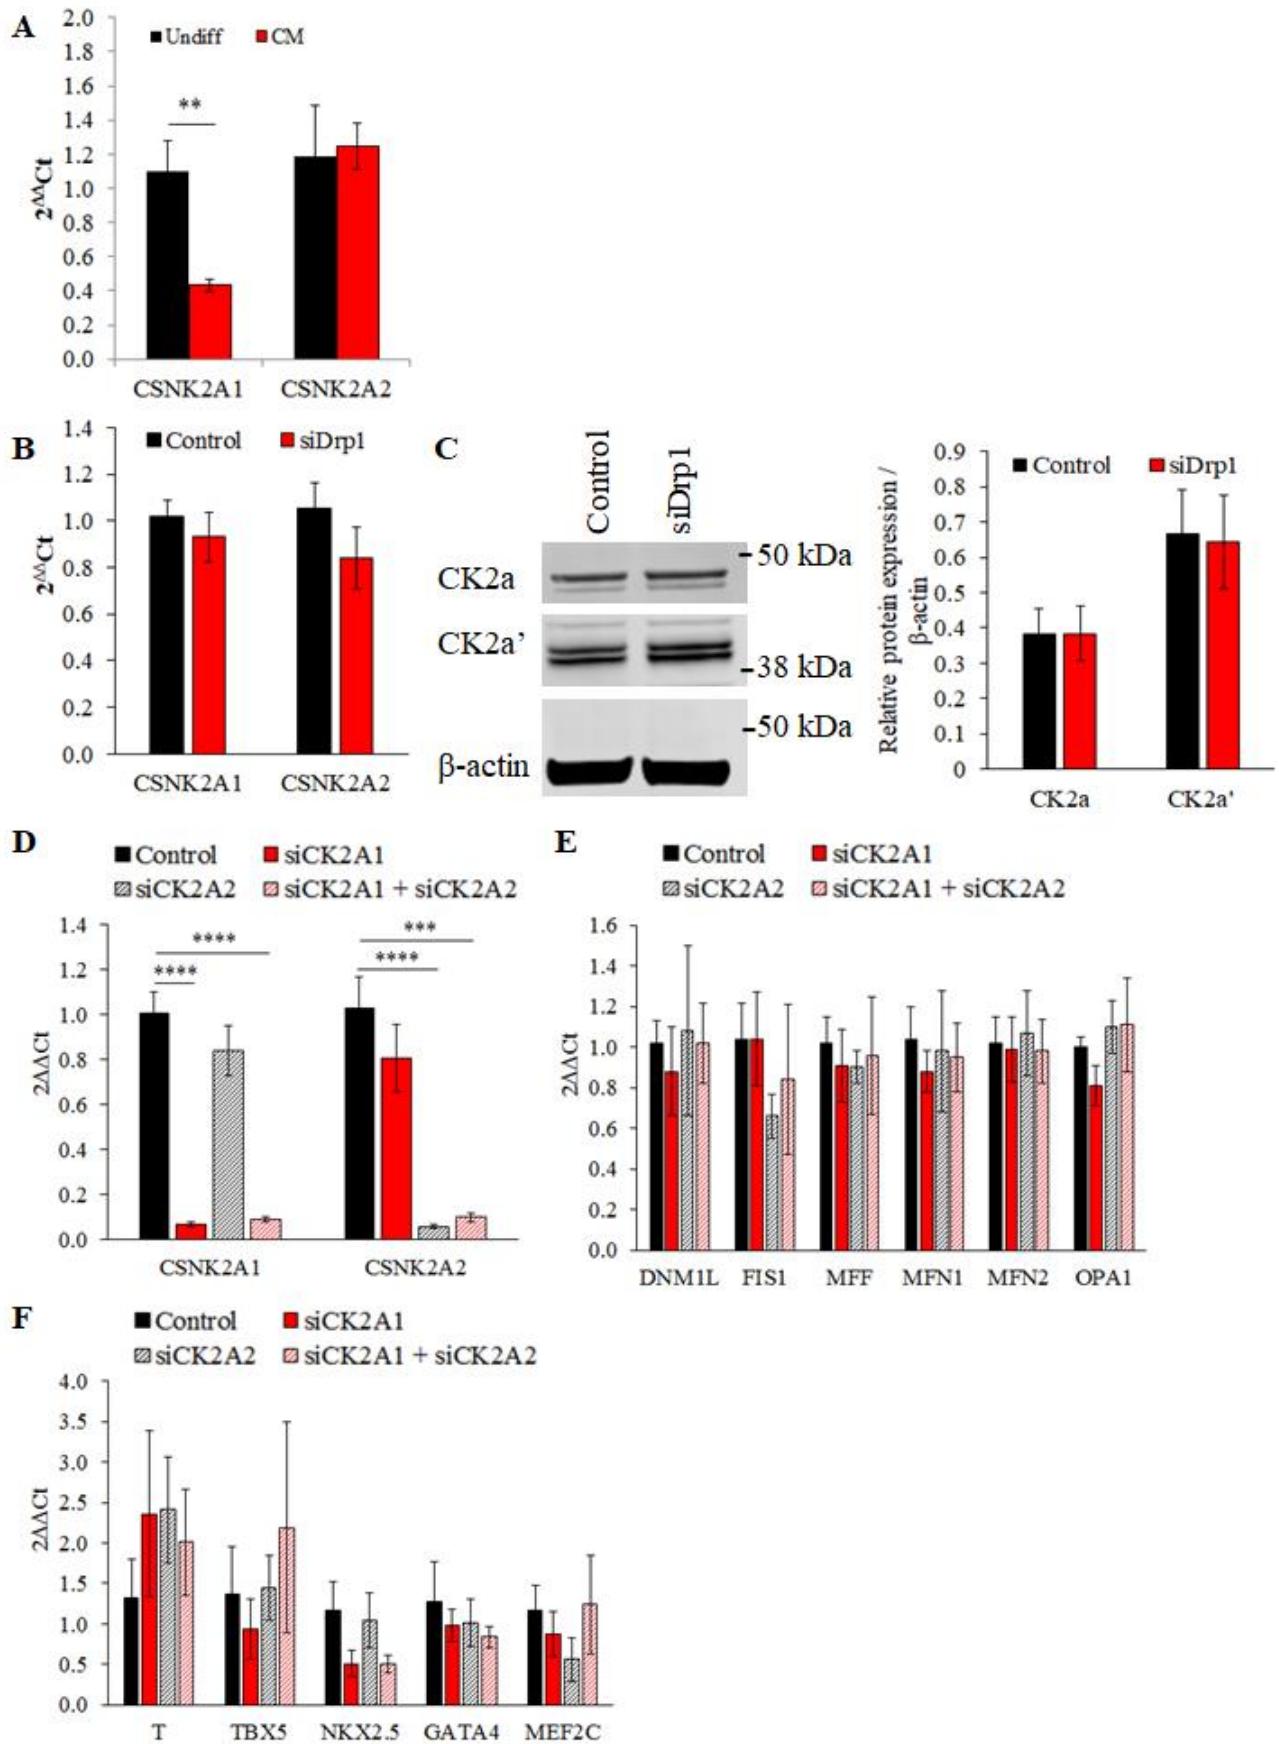

**Supplementary Figure S5. Functional interaction between Drp1 and CK2 proteins in iPS-Foreskin-2 cell line.** (A) mRNA expression of protein kinase CK2 $\alpha$  (CSNK2A1) and CK2 $\alpha'$  (CSNK2A2) in undifferentiated iPSCs (Undiff) and derived cardiomyocytes (CM) (n = 8 independent

experiments). **(B)** mRNA (n = 9 independent experiments) and **(C)** protein (n = 4 independent experiments) expressions of protein kinase CK2 $\alpha$  and CK2 $\alpha'$  in iPS(Foreskin)-2 cells treated with scrambled (control) or Drp1 siRNA. **(D-F)** mRNA expression of protein kinase CK2 $\alpha$  and CK2 $\alpha'$  **(D)**, mitochondrial fusion and fission genes **(E)**, and cardiac mesoderm transcription factors **(F)** in iPSCs treated with scrambled (control), CK2 $\alpha$  (siCK2A1), CK2 $\alpha'$  (siCK2A2) or both CK2 $\alpha$  and CK2 $\alpha'$  siRNA (n = 4 independent experiments). Data are shown as mean $\pm$ SEM. \*\* $P < 0.01$ , \*\*\* $P < 0.001$ , \*\*\*\* $P < 0.0001$  by one-way ANOVA with the Bonferroni post hoc test.

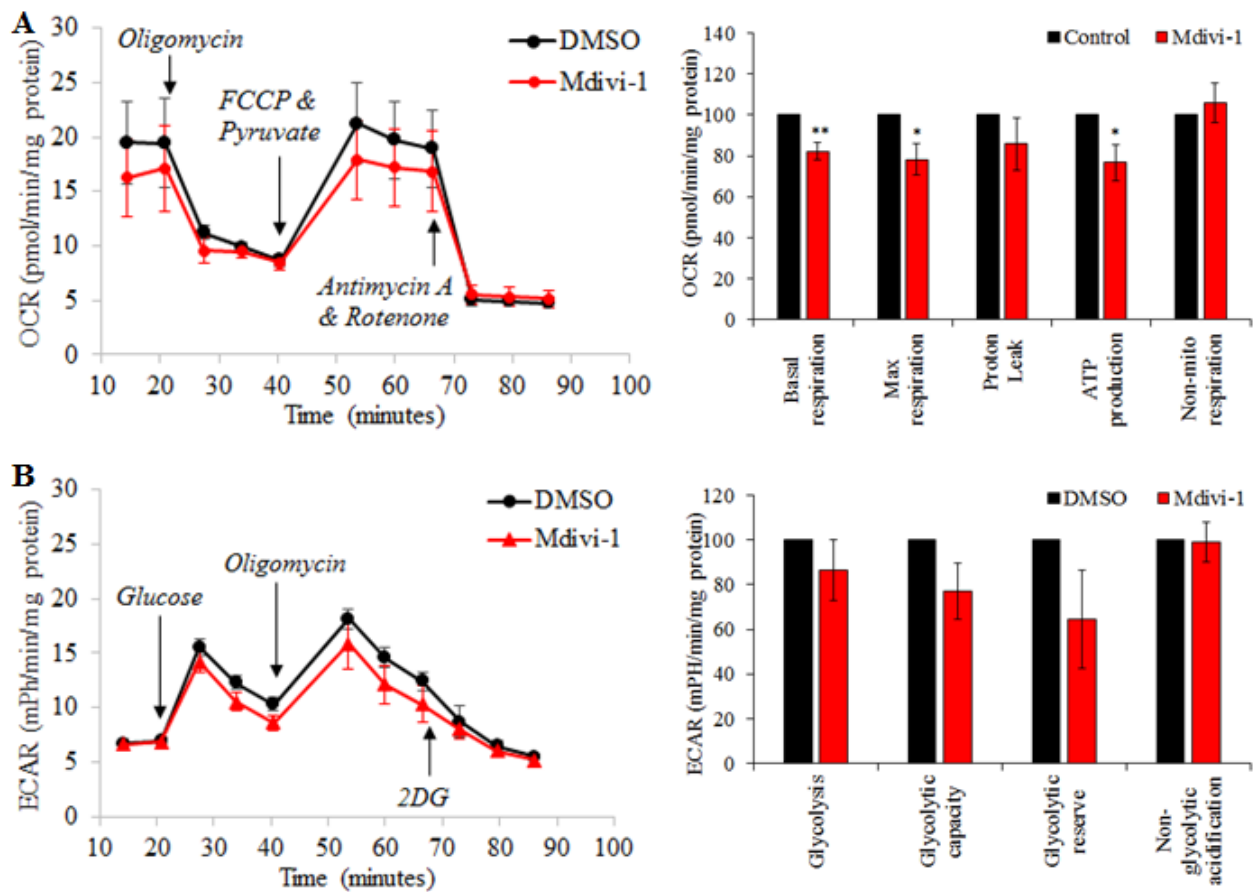

**Supplementary Figure S6. Effect of Mdivi-1 treatment on mitochondrial respiration and glycolysis.** (A) Oxygen consumption rate (OCR) and (B) extracellular acidification rate (ECAR) of iPS-Foreskin-2 cells treated with DMSO (control) or 5  $\mu$ M Mdivi-1 (n = 4 independent experiments). Data are shown as mean $\pm$ SEM. \* $P$  < 0.05, \*\* $P$  < 0.01 by unpaired Student's  $t$ -test.

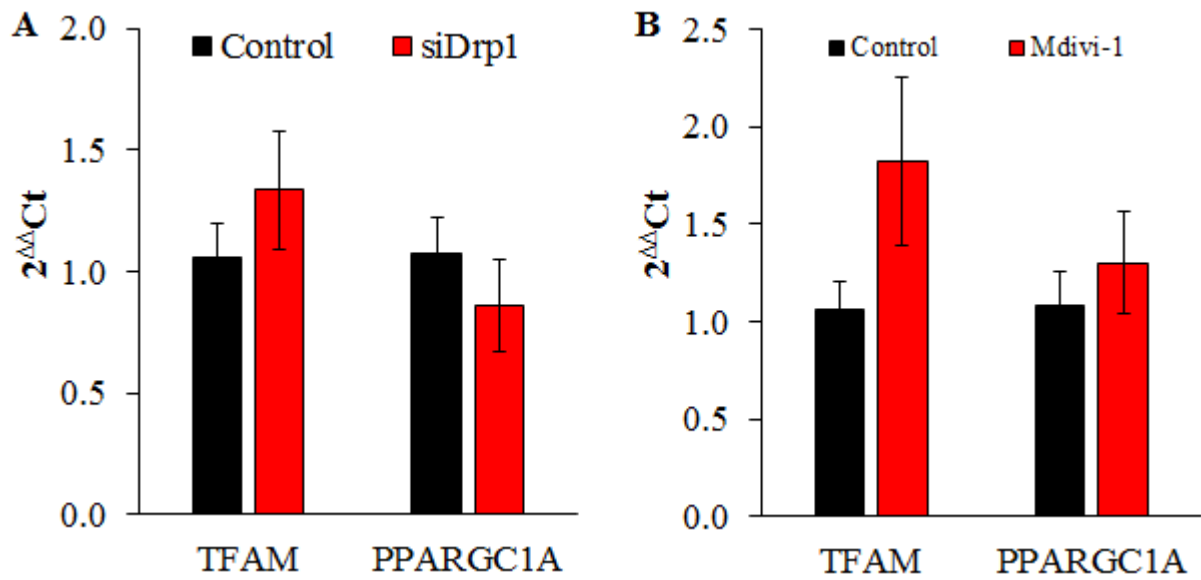

**Supplementary Figure S7.** Effect of Drp1 Knock down (A) and Mdivi-1 treatment (B) on gene expression of *TFAM* and *PPARGC1A* in iPS-Foreskin-2 cell line. (n = 7 independent experiments). Data are shown as mean±SEM.
